# Supplementary material for: Associations between Caregiver Mental Health, Early Childhood Language Outcomes, and Caregiver Perception Bias: Evidence from Rural China
Source: Research Square preprint supplement (doi:10.21203/rs.3.rs-7661882/v1), 2025-10-29
Supplement: Supplementary file 1 [file ea50d7371f49ce690fa518cd.docx]

**Appendix for *Associations between Caregiver Mental Health, Early Language Development and Environment, and Perception Bias: Evidence from rural China***

Note: *p<0.05; **p<0.01; ***p<0.001. Values in columns (1) to (2) presented as mean (SD).

| Appendix Table 1. Balance test by whether the participants completed the LENA recording | | | |
| --- | --- | --- | --- |
|  | (1)  Completed  (n=158) | (2)  Not completed  (n=36) | (1)-(2) |
| Child age (months) | 21.48  (1.64) | 21.53  (1.57) | -0.05 |
| Child is boy (1=yes) | 0.58  (0.49) | 0.50  (0.51) | 0.08 |
| Premature birth (1=yes) | 0.11  (0.32) | 0.06  (0.23) | 0.05 |
| Father is at home (1=yes) | 0.56  (0.50) | 0.67  (0.48) | -0.11 |
| Mother is the primary caregiver (1=yes) | 0.53  (0.50) | 0.64  (0.49) | -0.11 |
| Maternal age (years) | 28.34  (4.53) | 29.39  (3.89) | -1.05 |
| Mother graduated high school (1=yes) | 0.64  (0.48) | 0.72  (0.45) | -0.08 |
| Mother has a job (1=yes) | 0.62  (0.49) | 0.58  (0.50) | 0.04 |
| Number of adults in home | 2.75  (1.09) | 2.86  (0.90) | -0.11 |
| Family asset index | -0.02  (1.35) | 0.08  (1.63) | -0.10 |
